# Supplementary material for: Genomic mapping of 5-hydroxymethylcytosine in the human brain
Source: PubMed Central journal article supplement — Nucleic Acids Res. 2011 Mar 4;39(12):5015–24. doi: 10.1093/nar/gkr120 (PMC3130285; doi:10.1093/nar/gkr120), 2011-03-04
Supplement: supp_gkr120_Tables_S5-S8.pdf [file supp_gkr120_Tables_S5-S8.pdf]

**Table S5: Gene ontology analysis for 5hmC-specific peaks at promoters**

| Cluster    | GO ID                                    | GO Term                                                                | Count | P Value  | Genes                                                                                                                                                                                                                                                                                                                     |
|------------|------------------------------------------|------------------------------------------------------------------------|-------|----------|---------------------------------------------------------------------------------------------------------------------------------------------------------------------------------------------------------------------------------------------------------------------------------------------------------------------------|
| Cluster 1  | GO:0003012                               | muscle system process                                                  | 17    | 2.45E-02 | ADORA2B, BDKRB2, CRYAB, DYSF, EDNRA, GAL, GDNF, KCNE1, KCNIP2, MYLK2, NMUR1, P2RX3, P2RX4, TACR2, TMOD4, TNNT1, TNNT2                                                                                                                                                                                                     |
|            | GO:0006939                               | smooth muscle contraction                                              |       |          |                                                                                                                                                                                                                                                                                                                           |
|            | GO:0006936                               | muscle contraction                                                     |       |          |                                                                                                                                                                                                                                                                                                                           |
| Cluster 2  | GO:0010524                               | positive regulation of calcium ion transport into cytosol              | 27    | 2.57E-02 | ADORA2B, BCL2, BGLAP, CADM1, CREB1, CREB3, EDNRA, GDNF, GIMAP1, GIMAP5, HRH1, HTR2C, INPP5D, LCK, LHCGR, NEDD4L, NLRP12, P2RX3, P2RX4, PRKCZ, SLN, SMAD3, TAC4, THY1, TRIP6, UNC13D, XDH                                                                                                                                  |
|            | GO:0010522                               | regulation of calcium ion transport into cytosol                       |       |          |                                                                                                                                                                                                                                                                                                                           |
|            | GO:0051928                               | positive regulation of calcium ion transport                           |       |          |                                                                                                                                                                                                                                                                                                                           |
|            | GO:0043270                               | positive regulation of ion transport                                   |       |          |                                                                                                                                                                                                                                                                                                                           |
|            | GO:0010959                               | regulation of metal ion transport                                      |       |          |                                                                                                                                                                                                                                                                                                                           |
|            | GO:0051924                               | regulation of calcium ion transport                                    |       |          |                                                                                                                                                                                                                                                                                                                           |
|            | GO:0032846                               | positive regulation of homeostatic process                             |       |          |                                                                                                                                                                                                                                                                                                                           |
|            | GO:0051050                               | positive regulation of transport                                       |       |          |                                                                                                                                                                                                                                                                                                                           |
|            | GO:0043269                               | regulation of ion transport                                            |       |          |                                                                                                                                                                                                                                                                                                                           |
|            | GO:0051281                               | positive regulation of release of sequestered calcium ion into cytosol |       |          |                                                                                                                                                                                                                                                                                                                           |
|            | GO:0032844                               | regulation of homeostatic process                                      |       |          |                                                                                                                                                                                                                                                                                                                           |
|            | GO:0045428                               | regulation of nitric oxide biosynthetic process                        |       |          |                                                                                                                                                                                                                                                                                                                           |
|            | GO:0051279                               | regulation of release of sequestered calcium ion into cytosol          |       |          |                                                                                                                                                                                                                                                                                                                           |
|            | GO:0050850                               | positive regulation of calcium-mediated signaling                      |       |          |                                                                                                                                                                                                                                                                                                                           |
| GO:0050848 | regulation of calcium-mediated signaling |                                                                        |       |          |                                                                                                                                                                                                                                                                                                                           |
| GO:0048871 | multicellular organismal homeostasis     |                                                                        |       |          |                                                                                                                                                                                                                                                                                                                           |
| Cluster 3  | GO:0048812                               | neuron projection morphogenesis                                        | 46    | 3.09E-02 | ALDH1A2, ANTXR1, B3GNT2, BAIAP2L2, BCL2, BIN3, BTG2, CCKAR, CDH23, CHST3, CREB1, CRYGB, DMD, DSCAML1, EFNB3, EMX2, EPHA2, FEZ1, GAS7, GDNF, GLI2, GSX2, HOXC8, ITGB4, KCNIP2, MACF1, MAP2, MC1R, NCAM2, NFATC1, NGFR, NTM, NUMBL, OBSL1, PARD6B, PMP22, ROBO3, SLIT1, SOX1, TBR1, THY1, TNNT2, TSGA10, TULP3, UCHL1, ULK2 |
|            | GO:0030182                               | neuron differentiation                                                 |       |          |                                                                                                                                                                                                                                                                                                                           |
|            | GO:0000904                               | cell morphogenesis involved in differentiation                         |       |          |                                                                                                                                                                                                                                                                                                                           |
|            | GO:0007409                               | axonogenesis                                                           |       |          |                                                                                                                                                                                                                                                                                                                           |
|            | GO:0048667                               | cell morphogenesis involved in neuron differentiation                  |       |          |                                                                                                                                                                                                                                                                                                                           |
|            | GO:0031175                               | neuron projection development                                          |       |          |                                                                                                                                                                                                                                                                                                                           |
|            | GO:0048666                               | neuron development                                                     |       |          |                                                                                                                                                                                                                                                                                                                           |
|            | GO:0048858                               | cell projection morphogenesis                                          |       |          |                                                                                                                                                                                                                                                                                                                           |
|            | GO:0032990                               | cell part morphogenesis                                                |       |          |                                                                                                                                                                                                                                                                                                                           |
|            | GO:0032989                               | cellular component morphogenesis                                       |       |          |                                                                                                                                                                                                                                                                                                                           |
|            | GO:0030030                               | cell projection organization                                           |       |          |                                                                                                                                                                                                                                                                                                                           |
|            | GO:0000902                               | cell morphogenesis                                                     |       |          |                                                                                                                                                                                                                                                                                                                           |
| GO:0007411 | axon guidance                            |                                                                        |       |          |                                                                                                                                                                                                                                                                                                                           |
| Cluster 4  | GO:0007389                               | pattern specification process                                          | 24    | 3.16E-02 | ALDH1A2, AXIN1, BTG2, C6ORF59, DSCAML1, EDNRA, EMX2, GDF11, GLI2, GNA13, GRHL3, GSX2, HES7, HIPK2, HNF1B, HOXC8, LFNG, MDFI, MID1, MYF5, RTTN, SFRP1, SFRP2, TULP3                                                                                                                                                        |
|            | GO:0003002                               | regionalization                                                        |       |          |                                                                                                                                                                                                                                                                                                                           |

|           |            |                                                |    |          |                                                                                                                                                                                                                                                                                                                                                                                                                                          |
|-----------|------------|------------------------------------------------|----|----------|------------------------------------------------------------------------------------------------------------------------------------------------------------------------------------------------------------------------------------------------------------------------------------------------------------------------------------------------------------------------------------------------------------------------------------------|
|           | GO:0009952 | anterior/posterior pattern formation           |    |          |                                                                                                                                                                                                                                                                                                                                                                                                                                          |
| Cluster 5 | GO:0006812 | cation transport                               | 56 | 3.29E-02 | ACCN1, AQP6, ATP1B1, ATP1B2, ATP2A2, ATP2B4, ATP2C2, ATP6V0A2, BSPRY, C1QTNF3, CATSPER4, FKBP4, FTL, GABRE, GLRA4, GRIA4, GRID1, HCN1, HTR3E, HVCN1, KCNA6, KCNE1, KCNIP1, KCNIP2, KCNJ11, KCNJ2, KCNJ4, KCTD12, KCTD6, LCK, MCOLN2, MFI2, MPST, NEDD4L, NFATC1, NMUR1, P2RX3, P2RX4, PKD2L2, SFXN4, SLC12A8, SLC20A1, SLC22A17, SLC22A2, SLC22A3, SLC26A9, SLC34A1, SLC38A3, SLC5A10, SLC5A7, SLC9A8, SLN, STEAP4, TCIRG1, TRPV6, TTYH2 |
|           | GO:0006811 | ion transport                                  |    |          |                                                                                                                                                                                                                                                                                                                                                                                                                                          |
|           | GO:0030001 | metal ion transport                            |    |          |                                                                                                                                                                                                                                                                                                                                                                                                                                          |
|           | GO:0015672 | monovalent inorganic cation transport          |    |          |                                                                                                                                                                                                                                                                                                                                                                                                                                          |
|           | GO:0015674 | di-, tri-valent inorganic cation transport     |    |          |                                                                                                                                                                                                                                                                                                                                                                                                                                          |
|           | GO:0006813 | potassium ion transport                        |    |          |                                                                                                                                                                                                                                                                                                                                                                                                                                          |
| Cluster 6 | GO:0010810 | regulation of cell-substrate adhesion          | 16 | 3.56E-02 | BCL2, CADM1, CCDC80, CDKN2A, COL1A1, DDR1, DMP1, EMILIN1, GSN, LAMA3, LGALS3, MYF5, NID1, PRKCZ, SMAD3, TGFB1                                                                                                                                                                                                                                                                                                                            |
|           | GO:0010811 | positive regulation of cell-substrate adhesion |    |          |                                                                                                                                                                                                                                                                                                                                                                                                                                          |
|           | GO:0030155 | regulation of cell adhesion                    |    |          |                                                                                                                                                                                                                                                                                                                                                                                                                                          |
|           | GO:0045785 | positive regulation of cell adhesion           |    |          |                                                                                                                                                                                                                                                                                                                                                                                                                                          |
|           | GO:0030198 | extracellular matrix organization              |    |          |                                                                                                                                                                                                                                                                                                                                                                                                                                          |
|           | GO:0043062 | extracellular structure organization           |    |          |                                                                                                                                                                                                                                                                                                                                                                                                                                          |

**Table S6: Gene ontology analysis for 5mC-specific peaks at promoters**

| Cluster    | GO ID              | GO Term                                              | Count | P Value  | Genes                                                                                                                                                                                                                                                        |
|------------|--------------------|------------------------------------------------------|-------|----------|--------------------------------------------------------------------------------------------------------------------------------------------------------------------------------------------------------------------------------------------------------------|
| Cluster 1  | GO:0007126         | meiosis                                              | 34    | 5.65E-03 | ADAD1, ASZ1, BCL6, BOLL, CATSPER2, CETN1, DAZ1, DAZ2, DAZ3, DAZ4, DAZL, HORMAD1, ITGB1, MAD1L1, MAEL, MEI1, MORC1, OOEP, OVOL1, PIWIL1, PIWIL2, PRKACG, RAD51C, RBMY1F, SOHLH2, SPDYA, SYCE1, SYCE1L, TDRD1, TDRD6, TP73, TTN, USP22, VCPIP1                 |
|            | GO:0051327         | M phase of meiotic cell cycle                        |       |          |                                                                                                                                                                                                                                                              |
|            | GO:0051321         | meiotic cell cycle                                   |       |          |                                                                                                                                                                                                                                                              |
|            | GO:0048232         | male gamete generation                               |       |          |                                                                                                                                                                                                                                                              |
|            | GO:0007283         | spermatogenesis                                      |       |          |                                                                                                                                                                                                                                                              |
|            | GO:0007128         | meiotic prophase I                                   |       |          |                                                                                                                                                                                                                                                              |
|            | GO:0051324         | prophase                                             |       |          |                                                                                                                                                                                                                                                              |
|            | GO:0007276         | gamete generation                                    |       |          |                                                                                                                                                                                                                                                              |
|            | GO:0019953         | sexual reproduction                                  |       |          |                                                                                                                                                                                                                                                              |
|            | GO:0048609         | reproductive process in a multicellular organism     |       |          |                                                                                                                                                                                                                                                              |
|            | GO:0032504         | multicellular organism reproduction                  |       |          |                                                                                                                                                                                                                                                              |
|            | GO:0007127         | meiosis I                                            |       |          |                                                                                                                                                                                                                                                              |
|            | GO:0000279         | M phase                                              |       |          |                                                                                                                                                                                                                                                              |
|            | GO:0022403         | cell cycle phase                                     |       |          |                                                                                                                                                                                                                                                              |
|            | GO:0048610         | reproductive cellular process                        |       |          |                                                                                                                                                                                                                                                              |
| GO:0022402 | cell cycle process |                                                      |       |          |                                                                                                                                                                                                                                                              |
| GO:0007049 | cell cycle         |                                                      |       |          |                                                                                                                                                                                                                                                              |
| Cluster 2  | GO:0006334         | nucleosome assembly                                  | 33    | 6.76E-03 | ASZ1, C1QTNF7, CAT, H2AFB1, H2AFB2, H2AFB3, H2BFWT, H3F3C, HIST1H2AA, HIST1H2BA, HIST1H2BI, HIST1H3E, HIST1H3G, HIST3H3, IRF7, LCAT, MAEL, MTERF, NAP1L5, NAT14, OOEP, RAD51C, SFRS6, SKAP2, SOAT2, TADA3, TRRAP, TTN, TUBA3D, TUBA3E, USP22, WDR77, WHSC1L1 |
|            | GO:0031497         | chromatin assembly                                   |       |          |                                                                                                                                                                                                                                                              |
|            | GO:0065004         | protein-DNA complex assembly                         |       |          |                                                                                                                                                                                                                                                              |
|            | GO:0034728         | nucleosome organization                              |       |          |                                                                                                                                                                                                                                                              |
|            | GO:0006323         | DNA packaging                                        |       |          |                                                                                                                                                                                                                                                              |
|            | GO:0034622         | cellular macromolecular complex assembly             |       |          |                                                                                                                                                                                                                                                              |
|            | GO:0006333         | chromatin assembly or disassembly                    |       |          |                                                                                                                                                                                                                                                              |
|            | GO:0034621         | cellular macromolecular complex subunit organization |       |          |                                                                                                                                                                                                                                                              |
|            | GO:0043933         | macromolecular complex subunit organization          |       |          |                                                                                                                                                                                                                                                              |
|            | GO:0065003         | macromolecular complex assembly                      |       |          |                                                                                                                                                                                                                                                              |
|            | GO:0051276         | chromosome organization                              |       |          |                                                                                                                                                                                                                                                              |
|            | GO:0006325         | chromatin organization                               |       |          |                                                                                                                                                                                                                                                              |
|            | GO:0043623         | cellular protein complex assembly                    |       |          |                                                                                                                                                                                                                                                              |
|            | GO:0006461         | protein complex assembly                             |       |          |                                                                                                                                                                                                                                                              |
|            | GO:0070271         | protein complex biogenesis                           |       |          |                                                                                                                                                                                                                                                              |
|            | GO:0045727         | positive regulation of translation                   |       |          | BIRC7, BOLL, DAZ1, DAZ2, DAZ3, DAZ4, DAZL, EIF5AL1, FEM1A, KIAA0427, NDUFA13, PIWIL1, PIWIL2, RPS4X, TLR4, TNRC6A, TP73                                                                                                                                      |
|            | GO:0006417         | regulation of translation                            |       |          |                                                                                                                                                                                                                                                              |
|            | GO:0045948         | positive regulation of translational initiation      |       |          |                                                                                                                                                                                                                                                              |

|           |            |                                                           |    |          |
|-----------|------------|-----------------------------------------------------------|----|----------|
| Cluster 3 | GO:0010608 | posttranscriptional regulation of gene expression         | 17 | 2.70E-02 |
|           | GO:0006446 | regulation of translational initiation                    |    |          |
|           | GO:0032268 | regulation of cellular protein metabolic process          |    |          |
|           | GO:0032270 | positive regulation of cellular protein metabolic process |    |          |
|           | GO:0051247 | positive regulation of protein metabolic process          |    |          |

| <b>Table S7: Gene ontology analysis for 5hmC-specific peaks at gene bodies</b> |                       |                                                                               |              |                |                                                                                                                                                                                                                                                                                                         |
|--------------------------------------------------------------------------------|-----------------------|-------------------------------------------------------------------------------|--------------|----------------|---------------------------------------------------------------------------------------------------------------------------------------------------------------------------------------------------------------------------------------------------------------------------------------------------------|
| <b>Cluster</b>                                                                 | <b>GO ID</b>          | <b>GO Term</b>                                                                | <b>Count</b> | <b>P Value</b> | <b>Genes</b>                                                                                                                                                                                                                                                                                            |
| Cluster 1                                                                      | GO:0030029            | actin filament-based process                                                  | 19           | 9.79E-03       | ABL1, ADD1, CRYAA, DIAPH2, DMD, EPB41L1, FSCN1, GAS7, INPP5K, LASP1, MYH10, MYH9, MYO1E, NEDD9, NPHP4, PCNT, PRKCZ, RAC1, TLN1                                                                                                                                                                          |
|                                                                                | GO:0030036            | actin cytoskeleton organization                                               |              |                |                                                                                                                                                                                                                                                                                                         |
|                                                                                | GO:0007015            | actin filament organization                                                   |              |                |                                                                                                                                                                                                                                                                                                         |
|                                                                                | GO:0007010            | cytoskeleton organization                                                     |              |                |                                                                                                                                                                                                                                                                                                         |
| Cluster 2                                                                      | GO:0010551            | regulation of specific transcription from RNA polymerase II promoter          | 11           | 1.78E-02       | BCOR, GDNF, HDAC4, HEY2, HHEX, INSR, ITGB1BP3, NOTCH1, NR1H2, SMAD3, USF1                                                                                                                                                                                                                               |
|                                                                                | GO:0032583            | regulation of gene-specific transcription                                     |              |                |                                                                                                                                                                                                                                                                                                         |
|                                                                                | GO:0010553            | negative regulation of specific transcription from RNA polymerase II promoter |              |                |                                                                                                                                                                                                                                                                                                         |
|                                                                                | GO:0032582            | negative regulation of gene-specific transcription                            |              |                |                                                                                                                                                                                                                                                                                                         |
|                                                                                | GO:0016202            | regulation of striated muscle tissue development                              |              |                |                                                                                                                                                                                                                                                                                                         |
|                                                                                | GO:0048634            | regulation of muscle development                                              |              |                |                                                                                                                                                                                                                                                                                                         |
| Cluster 3                                                                      | GO:0006816            | calcium ion transport                                                         | 30           | 2.18E-02       | ANO8, ATP6V0A4, C16ORF7, CACNA1A, CACNA2D3, CACNG7, CAMK2G, CHRNA4, CHRNE, CLCN6, GRIN3A, GRIN3B, HCN2, KCNIP1, KCNK4, KCTD11, LASP1, LCK, NEDD4L, NFATC1, SLC10A3, SLC24A3, SLC26A9, SLC8A2, SLC8A3, SLC9A5, TRAPPC10, TRPM4, TST, TTYH2                                                               |
|                                                                                | GO:0015674            | di-, tri-valent inorganic cation transport                                    |              |                |                                                                                                                                                                                                                                                                                                         |
|                                                                                | GO:0006811            | ion transport                                                                 |              |                |                                                                                                                                                                                                                                                                                                         |
|                                                                                | GO:0030001            | metal ion transport                                                           |              |                |                                                                                                                                                                                                                                                                                                         |
|                                                                                | GO:0006812            | cation transport                                                              |              |                |                                                                                                                                                                                                                                                                                                         |
|                                                                                | GO:0006814            | sodium ion transport                                                          |              |                |                                                                                                                                                                                                                                                                                                         |
|                                                                                | GO:0015672            | monovalent inorganic cation transport                                         |              |                |                                                                                                                                                                                                                                                                                                         |
| Cluster 4                                                                      | GO:0006917            | induction of apoptosis                                                        | 41           | 2.25E-02       | ABL1, ALOX12, AXIN1, BBC3, CACNA1A, CBX4, CDKN1A, CRYAA, DEDD, FURIN, GDNF, IGHMBP2, INHA, LCK, MCF2L, MITF, MX1, MYO18A, NAI1, NET1, NLRP12, NOS3, NOTCH1, PCBP4, PEG10, PIM3, PLA2G6, PLEKHG5, PRKCZ, PRUNE2, RAC1, RASSF5, SART1, SFN, SMAD3, TERT, TNFRSF19, TNFSF12-TNFSF13, TNFSF13, VAV2, ZBTB16 |
|                                                                                | GO:0012502            | induction of programmed cell death                                            |              |                |                                                                                                                                                                                                                                                                                                         |
|                                                                                | GO:0042981            | regulation of apoptosis                                                       |              |                |                                                                                                                                                                                                                                                                                                         |
|                                                                                | GO:0043067            | regulation of programmed cell death                                           |              |                |                                                                                                                                                                                                                                                                                                         |
|                                                                                | GO:0010941            | regulation of cell death                                                      |              |                |                                                                                                                                                                                                                                                                                                         |
|                                                                                | GO:0043065            | positive regulation of apoptosis                                              |              |                |                                                                                                                                                                                                                                                                                                         |
|                                                                                | GO:0043068            | positive regulation of programmed cell death                                  |              |                |                                                                                                                                                                                                                                                                                                         |
|                                                                                | GO:0010942            | positive regulation of cell death                                             |              |                |                                                                                                                                                                                                                                                                                                         |
|                                                                                | GO:0043066            | negative regulation of apoptosis                                              |              |                |                                                                                                                                                                                                                                                                                                         |
|                                                                                | GO:0043069            | negative regulation of programmed cell death                                  |              |                |                                                                                                                                                                                                                                                                                                         |
|                                                                                | GO:0060548            | negative regulation of cell death                                             |              |                |                                                                                                                                                                                                                                                                                                         |
|                                                                                | GO:0006916            | anti-apoptosis                                                                |              |                |                                                                                                                                                                                                                                                                                                         |
|                                                                                | GO:0006915            | apoptosis                                                                     |              |                |                                                                                                                                                                                                                                                                                                         |
|                                                                                | GO:0008219            | cell death                                                                    |              |                |                                                                                                                                                                                                                                                                                                         |
| GO:0016265                                                                     | death                 |                                                                               |              |                |                                                                                                                                                                                                                                                                                                         |
| GO:0012501                                                                     | programmed cell death |                                                                               |              |                |                                                                                                                                                                                                                                                                                                         |
| Cluster 5                                                                      | GO:0008629            | induction of apoptosis by intracellular signals                               | 8            | 3.38E-02       | ABL1, BBC3, BRSK1, CDKN1A, FOXN3, PCBP4, SART1, SFN                                                                                                                                                                                                                                                     |
|                                                                                | GO:0008630            | DNA damage response, signal transduction resulting in induction of apoptosis  |              |                |                                                                                                                                                                                                                                                                                                         |
|                                                                                | GO:0042770            | DNA damage response, signal transduction                                      |              |                |                                                                                                                                                                                                                                                                                                         |
| Cluster 6                                                                      | GO:0001778            | plasma membrane repair                                                        | 8            | 4.52E-02       | DYSF, F8, GRHL3, MYH10, NOTCH1, PABPC4, SMAD3, SYT17                                                                                                                                                                                                                                                    |
|                                                                                | GO:0007009            | plasma membrane organization                                                  |              |                |                                                                                                                                                                                                                                                                                                         |
|                                                                                | GO:0042060            | wound healing                                                                 |              |                |                                                                                                                                                                                                                                                                                                         |

**Table S8: Gene ontology analysis for 5mC-specific peaks at gene bodies**

| Cluster   | GO ID      | GO Term                                               | Count | P Value  | Genes                                                                                                                                                                                                                                                                                                                                                                                                                                                                                                                                                                                                                                                                                                                                                                                                                 |
|-----------|------------|-------------------------------------------------------|-------|----------|-----------------------------------------------------------------------------------------------------------------------------------------------------------------------------------------------------------------------------------------------------------------------------------------------------------------------------------------------------------------------------------------------------------------------------------------------------------------------------------------------------------------------------------------------------------------------------------------------------------------------------------------------------------------------------------------------------------------------------------------------------------------------------------------------------------------------|
| Cluster 1 | GO:0007156 | homophilic cell adhesion                              | 90    | 6.45E-15 | ACTN1, AJAP1, APBA1, APOA4, ARVCF, C21ORF29, CD4, CD58, CDH20, CDH3, CDH4, CDH5, CELSR1, CELSR2, CELSR3, CLSTN1, CNTNAP1, CNTNAP3, COL18A1, COL22A1, COL27A1, COL6A1, COL6A2, DCHS1, DSCAML1, FAT3, FBLN7, FCGBP, FLRT1, HAPLN4, HAS1, ISLR, LAMA1, LAMC3, MAG, MAGI1, NID1, NINJ2, NLGN4Y, NPHP4, NRXN1, NRXN2, NRXN3, PCDH8, PCDHA1, PCDHA10, PCDHA11, PCDHA12, PCDHA13, PCDHA2, PCDHA3, PCDHA4, PCDHA5, PCDHA6, PCDHA7, PCDHA8, PCDHA9, PCDHGA1, PCDHGA10, PCDHGA11, PCDHGA12, PCDHGA2, PCDHGA3, PCDHGA4, PCDHGA5, PCDHGA6, PCDHGA7, PCDHGA8, PCDHGA9, PCDHGB1, PCDHGB2, PCDHGB3, PCDHGB4, PCDHGB5, PCDHGB6, PCDHGB7, PKD1, PTPRF, PTPRS, RADIL, SCARB1, SCRIB, SDK1, TECTA, TGFB111, THBS2, TMEM8B, TNN, TNXA, TNXB                                                                                               |
|           | GO:0016337 | cell-cell adhesion                                    |       |          |                                                                                                                                                                                                                                                                                                                                                                                                                                                                                                                                                                                                                                                                                                                                                                                                                       |
|           | GO:0007155 | cell adhesion                                         |       |          |                                                                                                                                                                                                                                                                                                                                                                                                                                                                                                                                                                                                                                                                                                                                                                                                                       |
|           | GO:0022610 | biological adhesion                                   |       |          |                                                                                                                                                                                                                                                                                                                                                                                                                                                                                                                                                                                                                                                                                                                                                                                                                       |
| Cluster 2 | GO:0030001 | metal ion transport                                   | 81    | 4.21E-04 | ACCN1, ADD2, ATP5F1, CACNA1A, CACNA1H, CACNA1I, CACNA2D4, CALHM1, CAMK2G, CELSR3, CHRFB7A, CHRFB7B, CHRFB7C, CHRFB7D, CHRFB7E, CHRFB7F, CHRFB7G, CHRFB7H, CHRFB7I, CHRFB7J, CHRFB7K, CHRFB7L, CHRFB7M, CHRFB7N, CHRFB7O, CHRFB7P, CHRFB7Q, CHRFB7R, CHRFB7S, CHRFB7T, CHRFB7U, CHRFB7V, CHRFB7W, CHRFB7X, CHRFB7Y, CHRFB7Z, GRIN2B, GRIN3B, HEPHL1, JPH1, JPH2, JPH3, KCNA5, KCNC1, KCNC4, KCND1, KCND2, KCND3, KCNF1, KCNG1, KCNG2, KCNG4, KCNJ12, KCNJ14, KCNJ4, KCNK3, KCNN1, KCNQ1, KCNQ2, KCNV2, KCTD15, LOC153328, MF12, MPST, MYO1C, NEDD4L, NFATC1, NOX5, OCA2, PKD1, POM121, POM121C, RGP4, RGP8, RYR1, RYR2, SCARA5, SCARB1, SCN4A, SLC12A4, SLC12A7, SLC19A1, SLC20A2, SLC25A24, SLC25A29, SLC25A6, SLC26A1, SLC2A5, SLC39A3, SLC41A3, SLC45A4, SLC47A2, SLC5A10, SLC9A3, SLCO3A1, SRI, SV2C, TRPM5, TRPV3 |
|           | GO:0006812 | cation transport                                      |       |          |                                                                                                                                                                                                                                                                                                                                                                                                                                                                                                                                                                                                                                                                                                                                                                                                                       |
|           | GO:0006816 | calcium ion transport                                 |       |          |                                                                                                                                                                                                                                                                                                                                                                                                                                                                                                                                                                                                                                                                                                                                                                                                                       |
|           | GO:0006811 | ion transport                                         |       |          |                                                                                                                                                                                                                                                                                                                                                                                                                                                                                                                                                                                                                                                                                                                                                                                                                       |
|           | GO:0006813 | potassium ion transport                               |       |          |                                                                                                                                                                                                                                                                                                                                                                                                                                                                                                                                                                                                                                                                                                                                                                                                                       |
|           | GO:0015674 | di-, tri-valent inorganic cation transport            |       |          |                                                                                                                                                                                                                                                                                                                                                                                                                                                                                                                                                                                                                                                                                                                                                                                                                       |
|           | GO:0055085 | transmembrane transport                               |       |          |                                                                                                                                                                                                                                                                                                                                                                                                                                                                                                                                                                                                                                                                                                                                                                                                                       |
|           | GO:0015672 | monovalent inorganic cation transport                 |       |          |                                                                                                                                                                                                                                                                                                                                                                                                                                                                                                                                                                                                                                                                                                                                                                                                                       |
| Cluster 3 | GO:0030182 | neuron differentiation                                | 70    | 3.49E-03 | AGRN, ANK1, ARPC4, BCL11B, BCL6, BRSK2, CACNA1A, CCNL2, CDH4, CELSR2, CELSR3, CHRNB2, COL18A1, COX10, CUX1, CYFIP1, DAPK3, DNAH17, DNAH5, DSCAML1, EPHA2, EPHB2, FGD3, Genes, GLI2, GLI3, GNAT1, IDUA, IGSF9, JAG2, JAK2, LAMA1, LHX2, LHX5, LINGO1, LRP5, LRP8, MAP1S, MAP7, MAPK8IP3, MC1R, MYH6, NCK2, NFATC1, NGFR, NOTCH1, NOTCH3, NR2E1, NRXN1, NRXN3, NTNG2, PCNT, PDGFB, PDGFRB, RPS27A, RTN1, RUNX3, SALL3, SCARB1, SCRIB, SHROOM3, STMN3, TNN, TP73, TSC2, TSGA10, TUBB2B, TUBB3, ULK1, USH1G, WNT7A                                                                                                                                                                                                                                                                                                        |
|           | GO:0000902 | cell morphogenesis                                    |       |          |                                                                                                                                                                                                                                                                                                                                                                                                                                                                                                                                                                                                                                                                                                                                                                                                                       |
|           | GO:0032989 | cellular component morphogenesis                      |       |          |                                                                                                                                                                                                                                                                                                                                                                                                                                                                                                                                                                                                                                                                                                                                                                                                                       |
|           | GO:0048812 | neuron projection morphogenesis                       |       |          |                                                                                                                                                                                                                                                                                                                                                                                                                                                                                                                                                                                                                                                                                                                                                                                                                       |
|           | GO:0032990 | cell part morphogenesis                               |       |          |                                                                                                                                                                                                                                                                                                                                                                                                                                                                                                                                                                                                                                                                                                                                                                                                                       |
|           | GO:0031175 | neuron projection development                         |       |          |                                                                                                                                                                                                                                                                                                                                                                                                                                                                                                                                                                                                                                                                                                                                                                                                                       |
|           | GO:0048858 | cell projection morphogenesis                         |       |          |                                                                                                                                                                                                                                                                                                                                                                                                                                                                                                                                                                                                                                                                                                                                                                                                                       |
|           | GO:0048667 | cell morphogenesis involved in neuron differentiation |       |          |                                                                                                                                                                                                                                                                                                                                                                                                                                                                                                                                                                                                                                                                                                                                                                                                                       |
|           | GO:0030030 | cell projection organization                          |       |          |                                                                                                                                                                                                                                                                                                                                                                                                                                                                                                                                                                                                                                                                                                                                                                                                                       |
|           | GO:0000904 | cell morphogenesis involved in differentiation        |       |          |                                                                                                                                                                                                                                                                                                                                                                                                                                                                                                                                                                                                                                                                                                                                                                                                                       |
|           | GO:0007409 | axonogenesis                                          |       |          |                                                                                                                                                                                                                                                                                                                                                                                                                                                                                                                                                                                                                                                                                                                                                                                                                       |
|           | GO:0048666 | neuron development                                    |       |          |                                                                                                                                                                                                                                                                                                                                                                                                                                                                                                                                                                                                                                                                                                                                                                                                                       |

|            |                                                        |                                                              |    |          |                                                                                                                                                                                                                                                                                                                                                                    |
|------------|--------------------------------------------------------|--------------------------------------------------------------|----|----------|--------------------------------------------------------------------------------------------------------------------------------------------------------------------------------------------------------------------------------------------------------------------------------------------------------------------------------------------------------------------|
|            | GO:0007411                                             | axon guidance                                                |    |          |                                                                                                                                                                                                                                                                                                                                                                    |
|            | GO:0006928                                             | cell motion                                                  |    |          |                                                                                                                                                                                                                                                                                                                                                                    |
| Cluster 4  | GO:0022604                                             | regulation of cell morphogenesis                             | 51 | 6.76E-03 | ADD2, AGRN, ATP10A, BCL6, CACNA1A, CDC42EP4, CDH4, CENPF, CHRN2, CYFIP1, DLL1, EPHB2, FGD3, FGF23, Genes, GLI2, GLI3, HLX, LHX5, LINGO1, MAG, MBP, MID1, MID1IP1, MYH14, NCK2, NEDD4L, NF1, NGFR, NOTCH1, NOTCH3, NR2E1, PACSIN1, PBX1, PLXNB2, PML, PPARA, PRDM16, PRKCZ, PTPRF, RPS27A, RUNX1, SHROOM3, SIX2, SKI, SMAD6, SPTB, TBX3, TGFB111, TTC3, ULK1, WNT7A |
|            | GO:0010769                                             | regulation of cell morphogenesis involved in differentiation |    |          |                                                                                                                                                                                                                                                                                                                                                                    |
|            | GO:0045664                                             | regulation of neuron differentiation                         |    |          |                                                                                                                                                                                                                                                                                                                                                                    |
|            | GO:0045596                                             | negative regulation of cell differentiation                  |    |          |                                                                                                                                                                                                                                                                                                                                                                    |
|            | GO:0051960                                             | regulation of nervous system development                     |    |          |                                                                                                                                                                                                                                                                                                                                                                    |
|            | GO:0060284                                             | regulation of cell development                               |    |          |                                                                                                                                                                                                                                                                                                                                                                    |
|            | GO:0010975                                             | regulation of neuron projection development                  |    |          |                                                                                                                                                                                                                                                                                                                                                                    |
|            | GO:0050767                                             | regulation of neurogenesis                                   |    |          |                                                                                                                                                                                                                                                                                                                                                                    |
|            | GO:0031344                                             | regulation of cell projection organization                   |    |          |                                                                                                                                                                                                                                                                                                                                                                    |
|            | GO:0031345                                             | negative regulation of cell projection organization          |    |          |                                                                                                                                                                                                                                                                                                                                                                    |
|            | GO:0050770                                             | regulation of axonogenesis                                   |    |          |                                                                                                                                                                                                                                                                                                                                                                    |
|            | GO:0050771                                             | negative regulation of axonogenesis                          |    |          |                                                                                                                                                                                                                                                                                                                                                                    |
|            | GO:0051129                                             | negative regulation of cellular component organization       |    |          |                                                                                                                                                                                                                                                                                                                                                                    |
|            | GO:0010721                                             | negative regulation of cell development                      |    |          |                                                                                                                                                                                                                                                                                                                                                                    |
|            | GO:0050768                                             | negative regulation of neurogenesis                          |    |          |                                                                                                                                                                                                                                                                                                                                                                    |
|            | GO:0010720                                             | positive regulation of cell development                      |    |          |                                                                                                                                                                                                                                                                                                                                                                    |
|            | GO:0050769                                             | positive regulation of neurogenesis                          |    |          |                                                                                                                                                                                                                                                                                                                                                                    |
| GO:0031346 | positive regulation of cell projection organization    |                                                              |    |          |                                                                                                                                                                                                                                                                                                                                                                    |
| GO:0050772 | positive regulation of axonogenesis                    |                                                              |    |          |                                                                                                                                                                                                                                                                                                                                                                    |
| GO:0051130 | positive regulation of cellular component organization |                                                              |    |          |                                                                                                                                                                                                                                                                                                                                                                    |
