# Supplementary figures and images for: Genomic mapping of 5-hydroxymethylcytosine in the human brain
Source: PubMed Central journal article supplement — Nucleic Acids Res. 2011 Mar 4;39(12):5015–24. doi: 10.1093/nar/gkr120 (PMC3130285; doi:10.1093/nar/gkr120), 2011-03-04

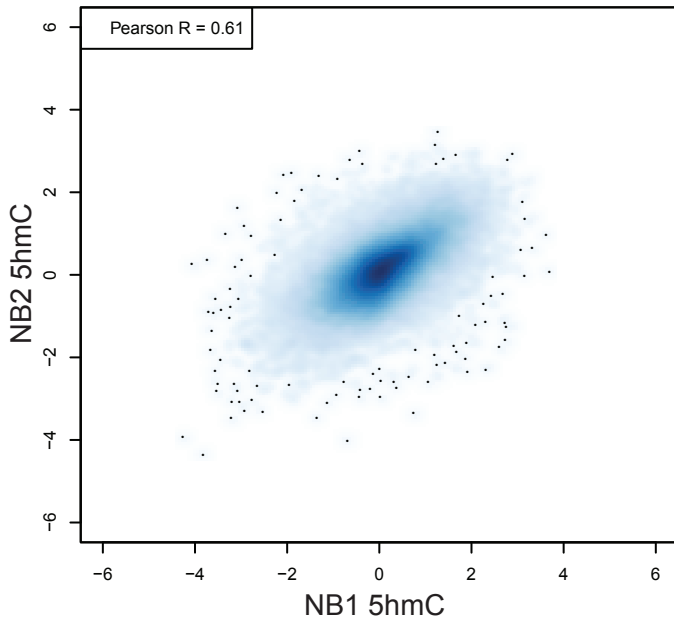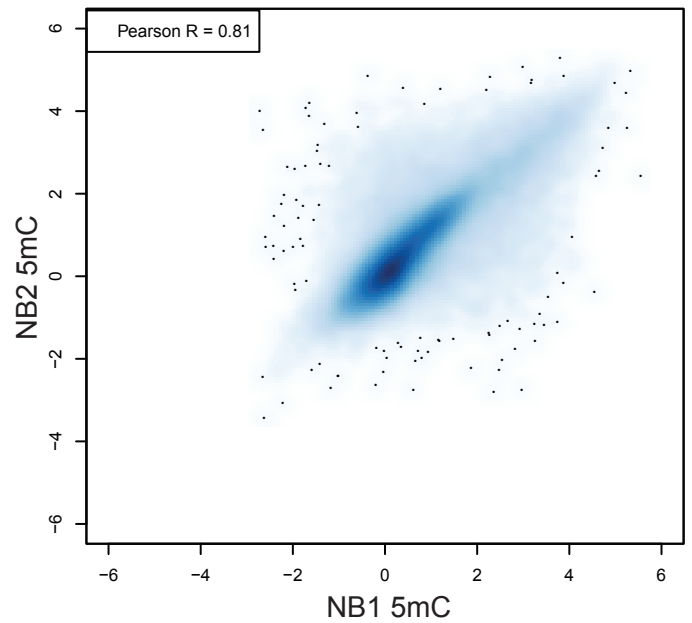

Figure S1:  
Log2 scatter plots of 5hmC and 5mC mapping data  
in two different brain samples (NB1 and NB2).

Supplement: supp_gkr120_Figure_S1.pdf [file supp_gkr120_Figure_S1.pdf]
